# Supplementary material for: Shewanella oneidensis arcA Mutation Impairs Aerobic Growth Mainly by Compromising Translation
Source: MDPI journal article supplement (doi:10.3390/life11090926), 2021-09-06
Supplement: s1 [file s1]

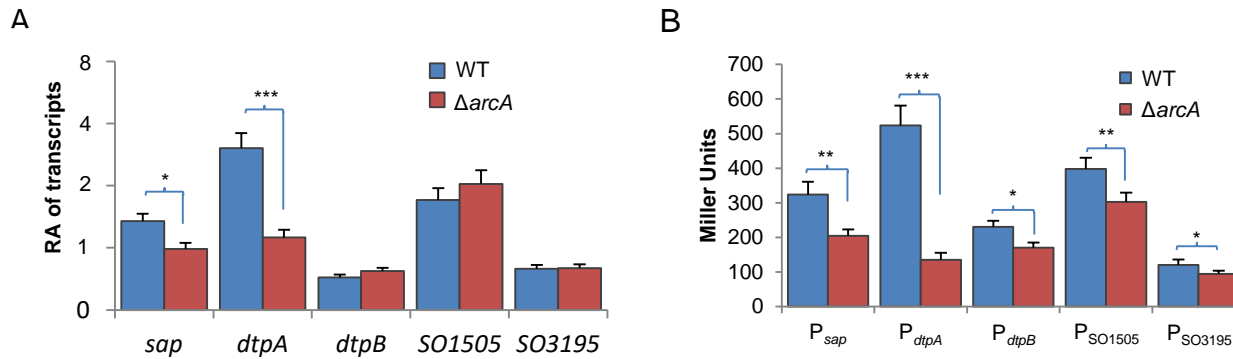

**FIGURE S1. Different expression of oligopeptide transporter genes revealed by qRT-PCR and *lacZ*-reporters.** (A) Expression levels revealed by qRT-PCR assay. The wild-type and  $\Delta arcA$  strains grown to the mid-log phase in MS containing 0.5% tryptone were used for the assay. The averaged values for each gene under test were normalized to that of the *recA* gene, giving to relative abundance (RA) of transcripts. Asterisks indicate statistically significant difference (\*,  $P < 0.05$ ; \*\*,  $P < 0.01$ ; \*\*\*,  $P < 0.001$ ). (B) Promoter activity assay. Indicated promoters were used to drive expression of the full-length *E. coli lacZ* gene within an integrative system.  $\beta$ -galactosidase activities in the mid-log phase cells were determined and presented as Miller Units. Experiments were performed independently at least 5 times, and data were presented as the average and error bars representing standard errors.

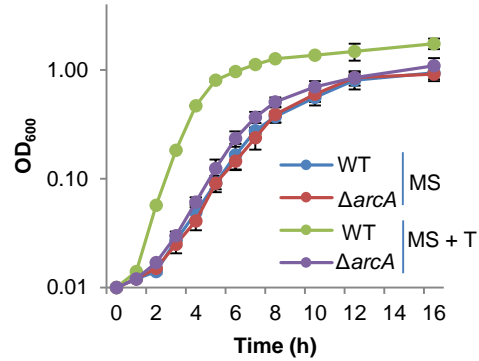

**FIGURE S2. Defects of the *arcA* mutant in aerobic growth.**

Growth of the wild-type and  $\Delta arcA$  strains in MS or MS containing 0.5% tryptone (T). Experiments were performed independently at least 5 times, and data were presented as the average and error bars representing standard deviation.

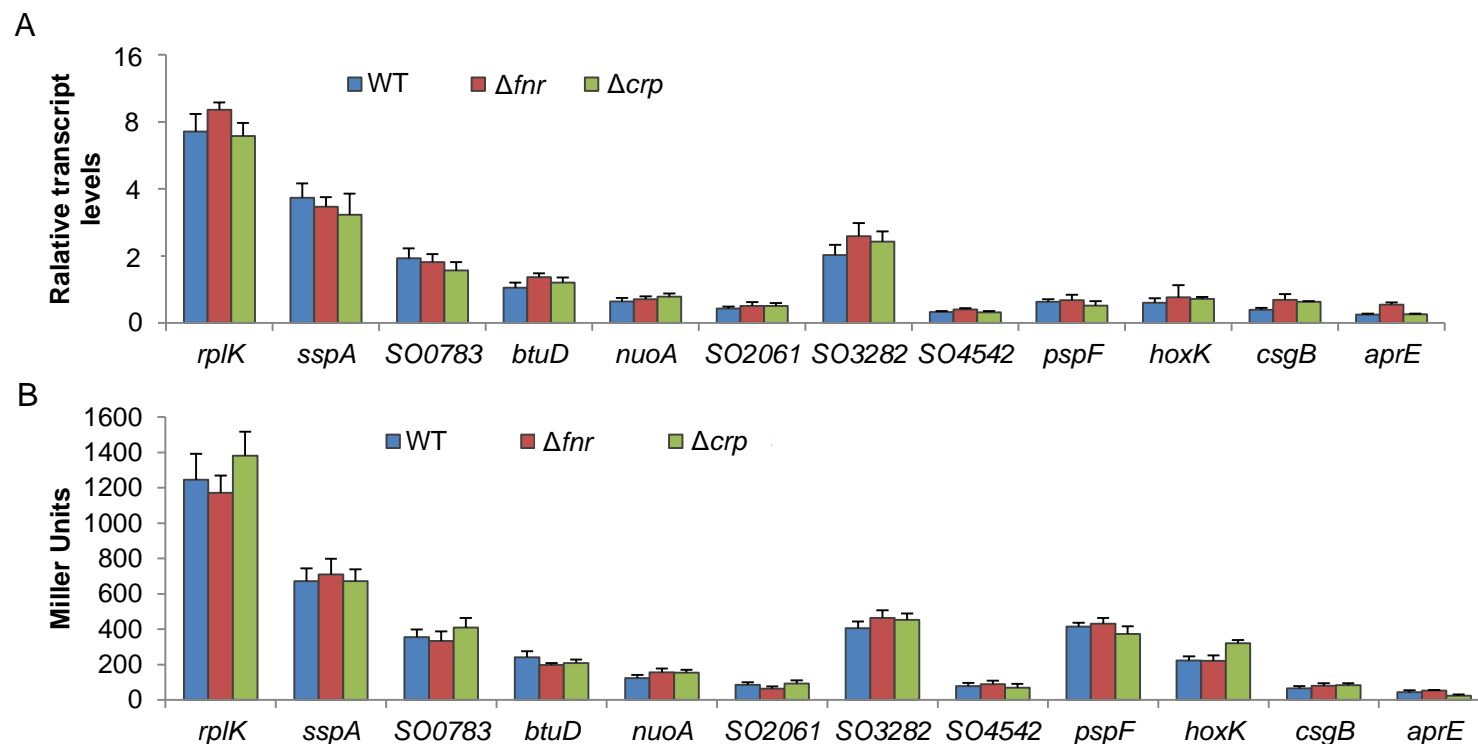

**FIGURE S3. Transcription and translation of 12 genes in the wild-type,  $\Delta fnr$ , and  $\Delta crp$  strains.** (A) Transcription levels revealed by qRT-PCR assay. Promoters of indicated genes were used to drive expression of the full-length *E. coli lacZ* gene integrated in the wild-type and  $\Delta arcA$  strains, which were grown to the mid-log phase in MS containing 0.5% tryptone. The averaged values for *lacZ* transcripts were normalized to that of the *recA* gene, giving to relative abundance (RA) of transcripts. (B) Promoter activity assay.  $\beta$ -galactosidase activities in cells used in (A) were determined and presented as Miller units. Experiments were performed independently at least 3 times, and data were presented as the average and error bars representing standard errors.

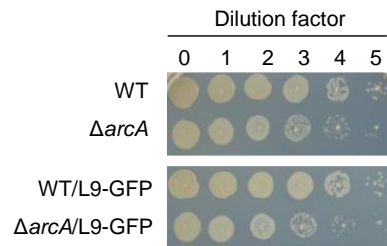

**FIGURE S4. L9 fusions do not affect growth.** Growth determined by droplet assays on MS + tryptone plates. Experiments were performed independently at least 3 times, with representative results being presented.

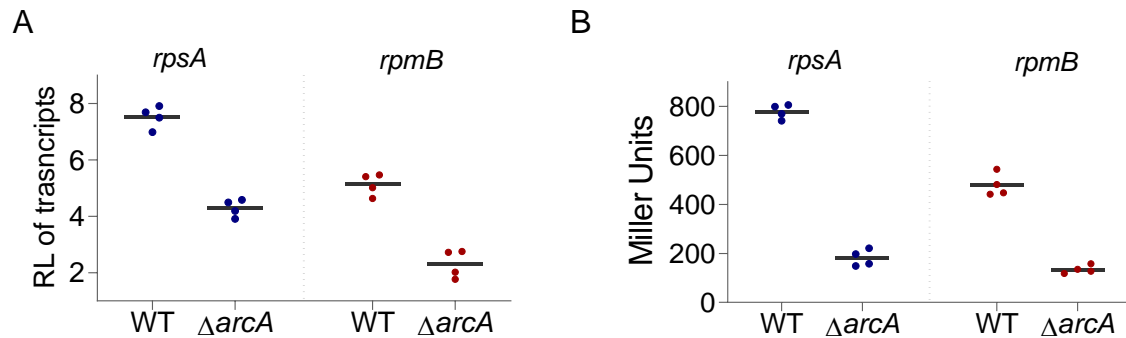

**FIGURE S5. Impacts of the manipulated production of RpsA or RpmB loss on transcription and translation.** (A) Transcription levels of 12 genes revealed by qRT-PCR assay. (B) Promoter activity assay.  $\beta$ -galactosidase activities in cells used in (A) were determined and presented as Miller units. Experiments were carried out the same as in Fig. 1.

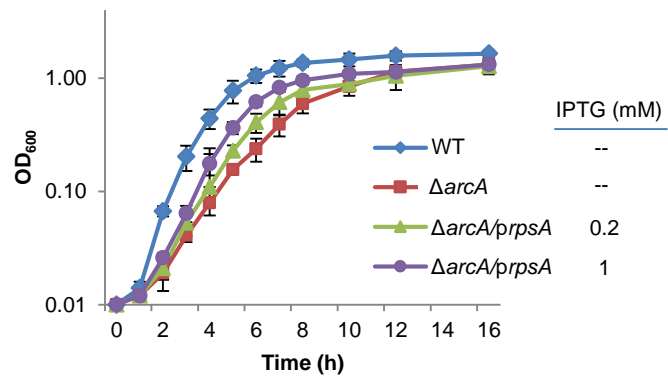

**FIGURE S6. Effects of manipulated RpsA production on growth of the *arcA* mutant.** Growth was determined by liquid MS + tryptone. Experiments were performed independently at least 3 times, and data were presented as the average and error bars representing standard deviation.

**TABLE S1.** Twelve genes whose transcription and translation were studied

| locus   | Gene        | Annotated function                                          | ArcA-binding motif <sup>a</sup> |
|---------|-------------|-------------------------------------------------------------|---------------------------------|
| SO_0220 | <i>rplk</i> | 50S ribosomal protein L11                                   |                                 |
| SO_1806 | <i>pspF</i> | psp operon transcriptional activator                        | GTAAATAAAATGTTT                 |
| SO_0611 | <i>sspA</i> | transcriptional activator                                   |                                 |
| SO_0783 |             | superfamily I DNA and RNA helicase                          |                                 |
| SO_0815 | <i>btuB</i> | ABC-type cobalamin uptake system ATPase component           |                                 |
| SO_0866 | <i>csgB</i> | minor curlin subunit                                        | GTAATTTAAATGTTA                 |
| SO_1021 | <i>nuoA</i> | NADH-quinone oxidoreductase subunit A                       |                                 |
| SO_2061 |             | predicted lipoprotein                                       |                                 |
| SO_2099 | <i>hoxK</i> | quinone-reactive NiFe hydrogenase, small subunit            | GTAAATTAAATGTCA                 |
| SO_3106 | <i>aprE</i> | extracellular serine alkaline protease                      | GTAAATTAATTGTTA                 |
| SO_3282 |             | energy taxis modulating methyl accepting sensory transducer |                                 |
| SO_4542 |             | transcriptional regulator LysR family                       |                                 |

<sup>a</sup> genes with an ArcA-binding motif are members of the ArcA regulon.

**TABLE S2.** Differences in expression of ribosomal proteins revealed by microarrays and proteomics analysis<sup>a</sup>

| Ribosomal components | Locus (gene)   | Transcriptomics<br>Log2( $\Delta arcA$ /WT) | Proteomics<br>Log2( $\Delta arcA$ /WT) |
|----------------------|----------------|---------------------------------------------|----------------------------------------|
| LSU L1P              | SO_0221 (RplA) | -1.4                                        | -1.1                                   |
| LSU L2P              | SO_0234 (RplB) | -0.1                                        | -1.3                                   |
| LSU L3P              | SO_0231 (RplC) | -1.0                                        | -1.5                                   |
| LSU L4P              | SO_0232 (RplD) | -0.1                                        | -1.0                                   |
| LSU L5P              | SO_0243 (RplE) | -1.4                                        | -1.3                                   |
| LSU L6P              | SO_0246 (RplF) | -0.6                                        | -1.5                                   |
| LSU L9P              | SO_3927 (RplI) | -1.1                                        | -1.8                                   |
| LSU L10P             | SO_0222 (RplJ) | -1.2                                        | -1.9                                   |
| LSU L11P             | SO_0220 (RplK) | -1.4                                        | -1.5                                   |
| LSU L7/12P           | SO_0223 (RplL) | -1.3                                        | -2.7                                   |
| LSU L13P             | SO_3940 (RplM) | -0.9                                        | -1.2                                   |
| LSU L14P             | SO_0241 (RplN) | -1.2                                        | -1.6                                   |
| LSU L15P             | SO_0250 (RplO) | -0.5                                        | -1.4                                   |
| LSU L16P             | SO_0238 (RplP) | -0.7                                        | -1.4                                   |
| LSU L17P             | SO_0257 (RplQ) | -0.9                                        | -1.4                                   |
| LSU L18P             | SO_0247 (RplR) | -0.4                                        | -1.8                                   |
| LSU L19P             | SO_1360 (RplS) | -1.0                                        | -1.3                                   |
| LSU L20P             | SO_2302 (RplT) | -0.9                                        | -0.5                                   |
| LSU L21P             | SO_3652 (RplU) | -0.6                                        | -1.2                                   |
| LSU L22P             | SO_0236 (RplV) | -0.4                                        | -1.9                                   |
| LSU L23P             | SO_0233        | -0.9                                        | -1.2                                   |
| LSU L24P             | SO_0242 (RplW) | -1.3                                        | -1.5                                   |
| LSU L25P             | SO_2112        | -0.8                                        | -1.3                                   |
| LSU L27P             | SO_3651 (RpmA) | -0.9                                        | -1.8                                   |
| LSU L28P             | SO_4247 (RpmB) | -1.6                                        | -2.1                                   |
| LSU L29P             | SO_0239 (RpmC) | 0.0                                         | -1.5                                   |
| LSU L30P             | SO_0249 (RpmD) | -0.9                                        | -1.9                                   |
| LSU L31P             | SO_4120 (RpmE) | -0.4                                        | -2.0                                   |
| LSU L32P             | SO_2780 (RpmF) | -0.9                                        | -1.6                                   |
| LSU L33P             | SO_4246 (RpmG) | -1.6                                        | -2.2                                   |
| LSU L34P             | SO_0007 (RpmH) | -0.8                                        | No Data                                |
| LSU L35P             | SO_2301 (RpmI) | 0.0                                         | No Data                                |
| LSU L36P             | SO_0252 (RpmJ) | -1.2                                        | No Data                                |
| SSU S1P              | SO_2402 (RpsA) | -1.0                                        | -2.3                                   |
| SSU S2P              | SO_1629 (RpsB) | -1.2                                        | -2.0                                   |
| SSU S3P              | SO_0237 (RpsC) | -0.4                                        | -0.8                                   |
| SSU S4P              | SO_0255 (RpsD) | -0.6                                        | -2.0                                   |
| SSU S5P              | SO_0248 (RpsE) | -1.0                                        | -2.3                                   |
| SSU S6P              | SO_3930 (RpsF) | -0.8                                        | -1.9                                   |
| SSU S7P              | SO_0227 (RpsG) | -1.2                                        | -0.7                                   |



|          |                |      |      |
|----------|----------------|------|------|
| SSU S8P  | SO_0245 (RpsH) | -0.9 | -2.0 |
| SSU S9P  | SO_3939 (RpsI) | -1.4 | -0.7 |
| SSU S10P | SO_0230 (RpsJ) | -1.3 | -0.9 |
| SSU S11P | SO_0254 (RpsK) | -0.9 | -2.1 |
| SSU S12P | SO_0226 (RpsL) | -1.5 | -1.5 |
| SSU S13P | SO_0253 (RpsM) | -0.7 | -0.2 |
| SSU S14P | SO_0244 (RpsN) | -0.9 | -1.1 |
| SSU S15P | SO_1207 (RpsO) | -0.8 | -1.4 |
| SSU S16P | SO_1357 (RpsP) | -1.2 | -2.9 |
| SSU S17P | SO_0240 (RpsQ) | -0.6 | -0.8 |
| SSU S18P | SO_3928 (RpsR) | -1.4 | -1.4 |
| SSU S19P | SO_0235 (RpsS) | -0.5 | -0.8 |
| SSU S20P | SO_3537 (RpsT) | -0.2 | -1.0 |
| SSU S21P | SO_1288 (RpsU) | -0.1 | -2.3 |

---

<sup>a</sup>Transcriptomics and proteomics data are from references 24 and 42, respectively.
